# Supplementary material for: Autoimmune and Metabolic Diseases and the Risk of Early-Onset Colorectal Cancer, a Nationwide Nested Case–Control Study
Source: Cancers (Basel). 2023 Jan 22;15(3):688. doi: 10.3390/cancers15030688 (PMC9913656; doi:10.3390/cancers15030688)
Supplement: Supplementary file 1 [file cancers-15-00688-s001.zip › cancers-2120345-supplementary.pdf]

**Table S1.** Diagnoses and their respective ICD-10-codes used to identify comorbid conditions in cases and controls.

| Diagnoses                                                                                                   | ICD-10-codes                |
|-------------------------------------------------------------------------------------------------------------|-----------------------------|
| <b>Metabolic conditions</b>                                                                                 |                             |
| Type 2 diabetes mellitus                                                                                    | E11                         |
| Essential (primary) hypertension                                                                            | I10                         |
| Disorders of lipoprotein metabolism and other lipidemias                                                    | E78                         |
| Overweight and obesity                                                                                      | E66                         |
| Fatty (change of) liver, not elsewhere classified                                                           | K76.0                       |
| <b>Inflammatory bowel disease and primary sclerosing cholangitis</b>                                        |                             |
| Crohn's disease                                                                                             | K50                         |
| Ulcerative colitis                                                                                          | K51                         |
| Indeterminate colitis                                                                                       | K52.3, K52.9                |
| Primary sclerosing cholangitis                                                                              | K83.0                       |
| <b>Autoimmune and chronic inflammatory conditions</b>                                                       |                             |
| <b>Diseases of the blood and blood-forming organs and certain disorders involving the immune mechanism.</b> |                             |
| Vitamin B12 deficiency anemia due to intrinsic factor deficiency                                            | D510                        |
| Other autoimmune hemolytic anemias                                                                          | D59.1                       |
| Other thrombophilia                                                                                         | D68.6                       |
| Immune thrombocytopenic purpura                                                                             | D69.3                       |
| Sarcoidosis                                                                                                 | D86                         |
| <b>Endocrine diseases</b>                                                                                   |                             |
| Hypothyroidism, other nontoxic goiter, thyrotoxicosis, thyroiditis                                          | E03-E06, excl. E06.0, E06.4 |
| Type 1 diabetes mellitus                                                                                    | E10                         |
| Addison, Primary adrenocortical insufficiency                                                               | E27.1                       |
| Autoimmune polyglandular failure                                                                            | E31.0                       |
| Non-neuropathic hereditary familial amyloidosis                                                             | E85.0                       |
| <b>Diseases of the nervous system</b>                                                                       |                             |
| Multiple sclerosis                                                                                          | G35                         |
| Inflammatory polyneuropathy, Guillain Barré                                                                 | G61                         |
| Myasthenia gravis                                                                                           | G70.0                       |
| <b>Diseases of the eye and adnexa</b>                                                                       |                             |
| Scleritis                                                                                                   | H15                         |
| Iridocyclitis                                                                                               | H20, excl. H20.2            |
| <b>Diseases of the circulatory system</b>                                                                   |                             |
| Rheumatic fever, other rheumatic heart diseases                                                             | I00-I09                     |
| Diseases of the digestive system excl. IBD                                                                  |                             |
| Primary biliary cholangitis                                                                                 | K74.3                       |
| Autoimmune hepatitis                                                                                        | K75.4                       |
| Intestinal malabsorption                                                                                    | K90.0                       |
| Diseases of the skin                                                                                        |                             |
| Dermatitis (pemphigoid)                                                                                     | L10.0, L12                  |
| Psoriasis                                                                                                   | L40                         |
| Erythema nodosum                                                                                            | L52                         |
| Vitiligo                                                                                                    | L80                         |
| Pyoderma gangrenosum                                                                                        | L88                         |
| <b>Diseases of the musculoskeletal system and connective tissue</b>                                         |                             |
| Reactive arthropathies                                                                                      | M02                         |
| Post infective arthropathies                                                                                | M03                         |
| Rheumatoid arthritis                                                                                        | M05-M06                     |
| Psoriatic arthropathy                                                                                       | M07.2-3                     |
| Juvenile arthritis                                                                                          | M08                         |
| Juvenile arthritis in psoriasis                                                                             | M09.0                       |
| Arthritis                                                                                                   | M13                         |
| Polyarteritis nodosa and related conditions                                                                 | M30                         |

|                                                 |                  |
|-------------------------------------------------|------------------|
| Other necrotizing vasculopathies                | M31              |
| Systemic lupus erythematosus                    | M32              |
| Dermatomyositis                                 | M33              |
| Systemic sclerosis                              | M34              |
| Other systemic involvement of connective tissue | M35, excl. M35.7 |
| Ankylosing spondylitis                          | M45              |
| Other inflammatory spondylopathies              | M46.0–1;8–9      |
| Rheumatism, unspecified                         | M79.0            |
| Relapsing polychondritis                        | M94.1            |
| Arteritis, unspecified                          | I77.6            |
| <b>Diseases of the genitourinary system</b>     |                  |
| Acute nephritic syndrome                        | N00              |
| Rapidly progressive nephritic syndrome          | N01              |
| Recurrent and persistent hematuria              | N02              |
| Chronic nephritic syndrome                      | N03              |
| Nephrotic syndrome                              | N04              |
| Unspecified nephritic syndrome                  | N05              |

**Table S2.** Source of identified metabolic comorbidities in Early onset colorectal cancer patients, diagnosed 2007-2016, and controls.

| Diagnose (ICD-code)                                              | Controls, n |      |     | Cases, n |     |     |
|------------------------------------------------------------------|-------------|------|-----|----------|-----|-----|
|                                                                  | source      |      |     | Source   |     |     |
|                                                                  | IPR         | PDR  | OPR | IPR      | PDR | OPR |
| Type 2 diabetes mellitus (E11)*                                  | 80          | 753  | 108 | 21       | 187 | 35  |
| Disorders of lipoprotein metabolism and other lipidemias (E78)** | 49          | 1409 | 62  | 15       | 276 | 10  |
| Primary hypertension (I10)***                                    | 137         | 3467 | 154 | 43       | 848 | 39  |

Abbreviations: ICD, international classification of disease, IPR, In-Patient Registry, PDR, Prescribed Drugs Registry, OPR, Out-Patient Registry. \*ATC-codes: A10, Insulins and analogues for injection, Blood glucose lowering drugs, excl. insulins. \*\*ATC-codes: C03, C07-C09, Diuretics, beta blocking agents, agents acting on the renin-angiotensin system. \*\*\*ATC-codes: C10, Lipid modifying agents.
